# Supplementary material
Source: Royal Society of Chemistry journal article supplement (doi:10.1039/d6ta02474b)
Supplement: d6ta02474b1.pdf [file d6ta02474b1.pdf]

## Supplementary Information

# Dual-Function Pt/Ir-Doped CdS Catalysts: Defect Engineering for Visible-Light HMF Photo Oxidation and Hydrogen Evolution Reaction

*Sunyoung Hwang,<sup>a,†</sup> Yerim Kim,<sup>a,†</sup> Yoonbeen Kang,<sup>b,†</sup> Jeonghyeon Kim,<sup>c,†</sup> Heewon Kim,<sup>a</sup> Yerin Bang,<sup>d</sup> Seojin Baek,<sup>b</sup> Jaeyoon Baik,<sup>e</sup> Seung-Ryong Kwon,<sup>d</sup> Sang-Yong Ju,<sup>b,\*</sup> Seol Baek,<sup>a,\*</sup> and Hangil Lee<sup>a,\*</sup>*

<sup>a</sup>Department of Chemistry, Sookmyung Women's University, Seoul 04310, Republic of Korea

<sup>b</sup>Department of Chemistry, Yonsei University, Seoul 03722, Republic of Korea

<sup>c</sup>Hydrogen Fuel Cell Research Center, Korea Institute of Science and Technology (KIST), Seoul 02792, Republic of Korea

<sup>d</sup>Department of Chemistry, Research Institute of Molecular Alchemy, Gyeongsang National University, Jinju 52828, Republic of Korea

<sup>e</sup>Beamline Research Division, Pohang Accelerator Laboratory (PAL), Pohang 37673, Republic of Korea

<sup>†</sup>These authors contributed equally to this work.

\*To whom correspondence should be addressed; E-mail: sbaek@sookmyung.ac.kr, syju@yonsei.ac.kr, easyscan@sookmyung.ac.kr

**Table S1.** Binding energies obtained from XPS analysis for the four CdS NPs.

| Samples               | Binding energy (eV)                    |                       |                              |
|-----------------------|----------------------------------------|-----------------------|------------------------------|
|                       | Cd <i>3d</i><br>CdS/CdS <sub>1-x</sub> | S <i>2p</i><br>CdS/MS | M                            |
| CdS                   | 404.8/0.0                              | 161.1/0.0             |                              |
| Li <sub>dp</sub> -CdS | 404.8/0.0                              | 161.1/0.0             | Li 1s: 55.6                  |
| Ir <sub>dp</sub> -CdS | 405.0/404.1                            | 160.85/160.35         | Ir 4f <sub>7/2</sub> : 64.95 |
| Pt <sub>dp</sub> -CdS | 404.95/404.05                          | 160.0/160.30          | Pt 4f <sub>7/2</sub> : 72.1  |

**Table S2.** Bandgap,  $E_F$  energy, and work function obtained from DRS and XPS analysis for the four CdS NPs.

| Samples               | Bandgap (eV) | $E_F$ (eV) | Work function (eV) |
|-----------------------|--------------|------------|--------------------|
| CdS                   | 2.30         | 1.75       | 4.45               |
| Li <sub>dp</sub> -CdS | 2.34         | 1.72       | 4.30               |
| Ir <sub>dp</sub> -CdS | 2.24         | 1.65       | 4.60               |
| Pt <sub>dp</sub> -CdS | 2.21         | 1.60       | 4.70               |

**Table S3.** Comparison of Ir<sub>dp</sub>-CdS with representative recently reported photocatalytic systems for HMF oxidation in aqueous media.

| Catalyst                                                                        | Light Source & Power                  | Base (additive) / Reaction time / HMF Conc.                | Target Product | Performance (HMF Conv. / Sel. or Yield)                                                       | Ref.      |
|---------------------------------------------------------------------------------|---------------------------------------|------------------------------------------------------------|----------------|-----------------------------------------------------------------------------------------------|-----------|
| Au/ZnO <sub>D</sub> <sub>P-H</sub>                                              | 300W Xe lamp ( $\lambda > 420$ nm)    | Na <sub>2</sub> CO <sub>3</sub> / 5 h / HMF conc.: 31.7 mM | FDCA           | HMF Conv.: 55.6%<br>FDCA Yield: 53.9%<br>Sel.: 96.9%                                          | [1]       |
| UCNT/Pt (3 wt.%)                                                                | 300W Xe lamp ( $\lambda \geq 420$ nm) | Base free / 5 h / HMF conc.: 10 mM                         | DFF            | DFF Sel.: 95%                                                                                 | [2]       |
| $\alpha$ -Fe <sub>2</sub> O <sub>3</sub> /Zn <sub>0.5</sub> Cd <sub>0.5</sub> S | 12W LED (413 nm)                      | (Air or Ar) / 24–32 h<br>HMF conc.: 100 mM                 | DFF<br>FDCA    | HMF Conv.: 75%, DFF Sel. (24 h, under Ar): 99%<br>HMF Conv.: 99%, FDCA Sel. (32 h, air) : 85% | [3]       |
| CdS@M Xene                                                                      | LED ( $\lambda > 420$ nm)             | Base free / 6 h / HMF conc.: 1 mM                          | DFF            | HMF Conv.: 63.89%<br>DFF Sel: 91.63%<br>DFF Yield 58.49%                                      | [4]       |
| CdS/WO <sub>3</sub>                                                             | 6W LED (445 nm)                       | Base free / 24 h<br>HMF conc.: 25 mM                       | FDCA           | HMF Conv: >97%<br>FDCA Yield: 61% (24h)                                                       | [5]       |
| Ir <sub>dp</sub> -CdS                                                           | 6W LED (445 nm)                       | Base free / 24 h<br>HMF conc.: 25 mM                       | FDCA           | HMF Conv: >95%<br>FDCA Yield: 59% (24h)                                                       | This Work |

**Table S4.** Comparison of the electrocatalytic activity with other previously reported CdS-based catalysts for HER.

| Catalysts                                                              | Tafel slope<br>(mV·dec <sup>-1</sup> ) | Overpotential<br>(mV) | Solution                             | Ref.      |
|------------------------------------------------------------------------|----------------------------------------|-----------------------|--------------------------------------|-----------|
| CdS <sub>1-x</sub>                                                     | 131.6                                  | 401 ( $\eta_{10}$ )   | 1 M KOH                              | [6]       |
| 20 wt % CdS <sub>1-x</sub><br>in WO <sub>3-x</sub>                     | 61.9                                   | 191 ( $\eta_{10}$ )   | 1 M KOH                              | [6]       |
| ZnS/CdS                                                                | 313.6                                  | 299 ( $\eta_{10}$ )   | 0.5 M H <sub>2</sub> SO <sub>4</sub> | [7]       |
| VS <sub>2</sub> /ZnS/CdS                                               | 74.4                                   | 86 ( $\eta_{10}$ )    | 0.5 M H <sub>2</sub> SO <sub>4</sub> | [7]       |
| CdS                                                                    | 151                                    | 334 ( $\eta_{10}$ )   | 1 M KOH                              | [8]       |
| CdS-V <sub>2</sub> O <sub>5</sub>                                      | 104                                    | 238 ( $\eta_{10}$ )   | 1 M KOH                              | [8]       |
| CdS-V <sub>2</sub> O <sub>5</sub> /<br>g-C <sub>3</sub> N <sub>4</sub> | 63                                     | 202 ( $\eta_{10}$ )   | 1 M KOH                              | [8]       |
| CdS                                                                    | 111                                    | 225 ( $\eta_{10}$ )   | 1 M KOH                              | [9]       |
| CdS/MIL-<br>101(Fe) (3:1)                                              | 47                                     | 108 ( $\eta_{10}$ )   | 1 M KOH                              | [9]       |
| Ir <sub>dp</sub> -CdS                                                  | 57.5                                   | 198.3 ( $\eta_1$ )    | 1 M KOH                              | This Work |
| Pt <sub>dp</sub> -CdS                                                  | 128.8                                  | 575.8 ( $\eta_1$ )    | 1 M KOH                              | This Work |

**Fig. S1** (a) Wide-angle XRD patterns and (b) Corresponding enlarged XRD view of the selected region for CdS (orange),  $\text{Li}_{\text{dp}}\text{-CdS}$  (green),  $\text{Ir}_{\text{dp}}\text{-CdS}$  (red), and  $\text{Pt}_{\text{dp}}\text{-CdS}$  NPs (blue).

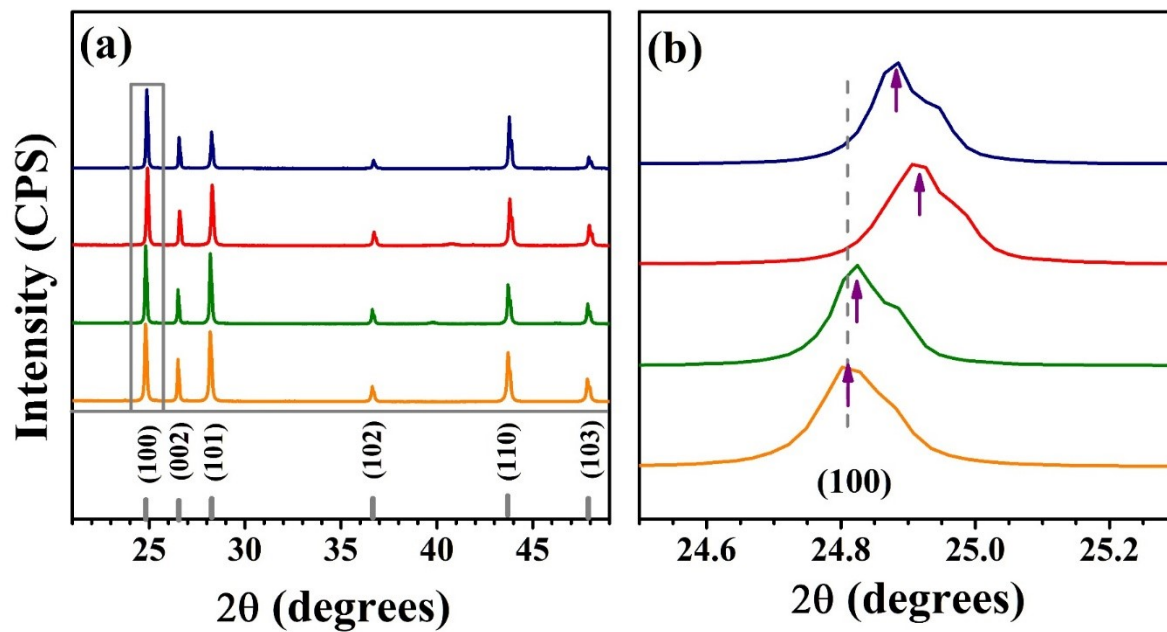

**Fig. S2** (a) Zoom-in Raman spectra, (b) Photocurrents generated by CdS (black),  $\text{Li}_{\text{dp}}$ -CdS (green),  $\text{Ir}_{\text{dp}}$ -CdS (red), and  $\text{Pt}_{\text{dp}}$ -CdS (blue) NPs in the presence of  $\text{Na}_2\text{SO}_3$  (0.025 M) as a hole scavenging agent.

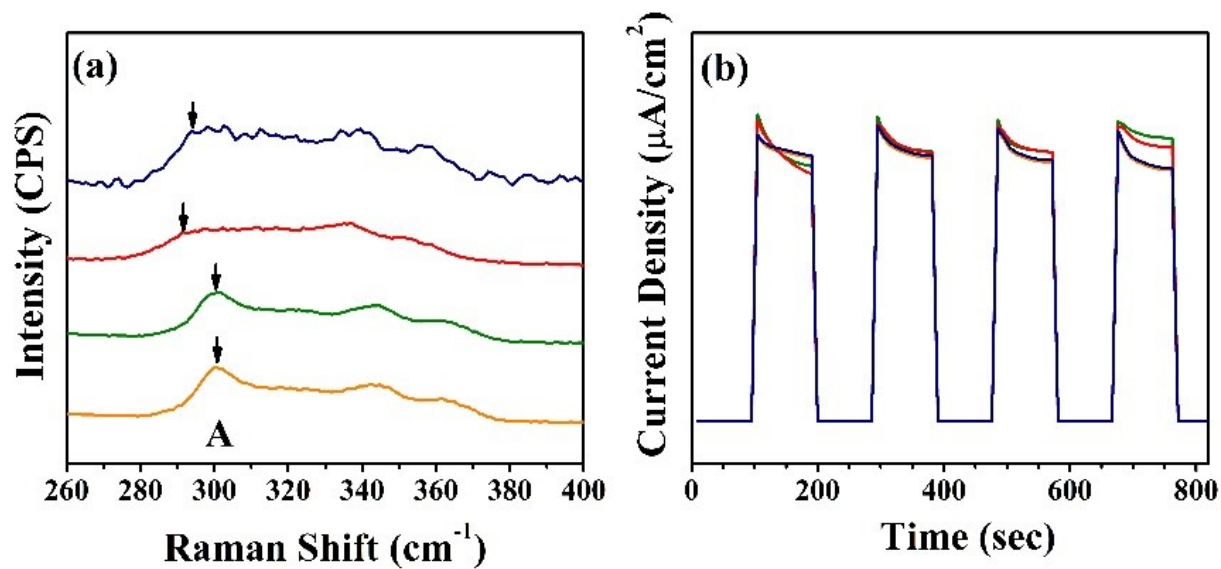

**Fig. S3** (a) UV-Vis DRS spectra, (b) Work function measurements, and (c) Valence band spectra of CdS (orange),  $\text{Li}_{\text{dp}}$ -CdS (green),  $\text{Ir}_{\text{dp}}$ -CdS (red), and  $\text{Pt}_{\text{dp}}$ -CdS (blue) NPs.

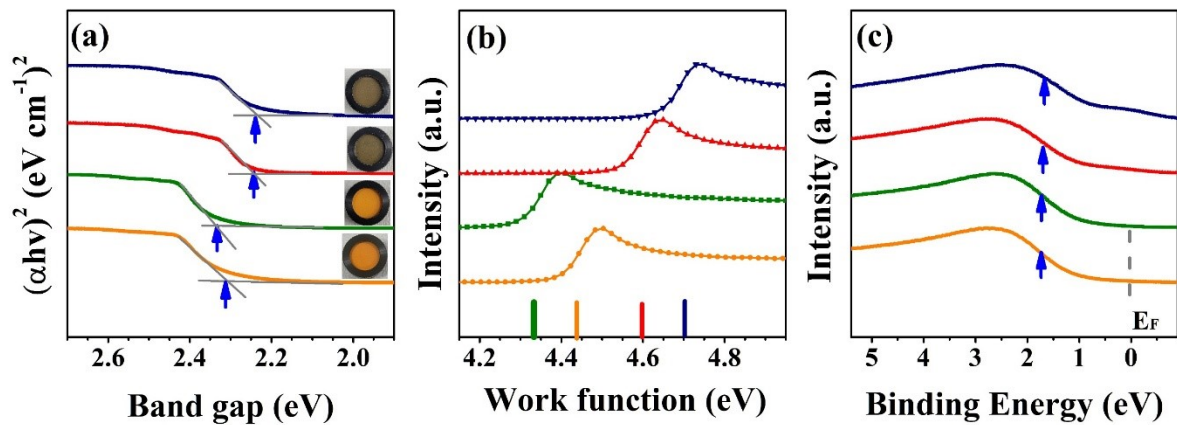

Fig. S4 LC-MS spectra of the four CdS NPs.

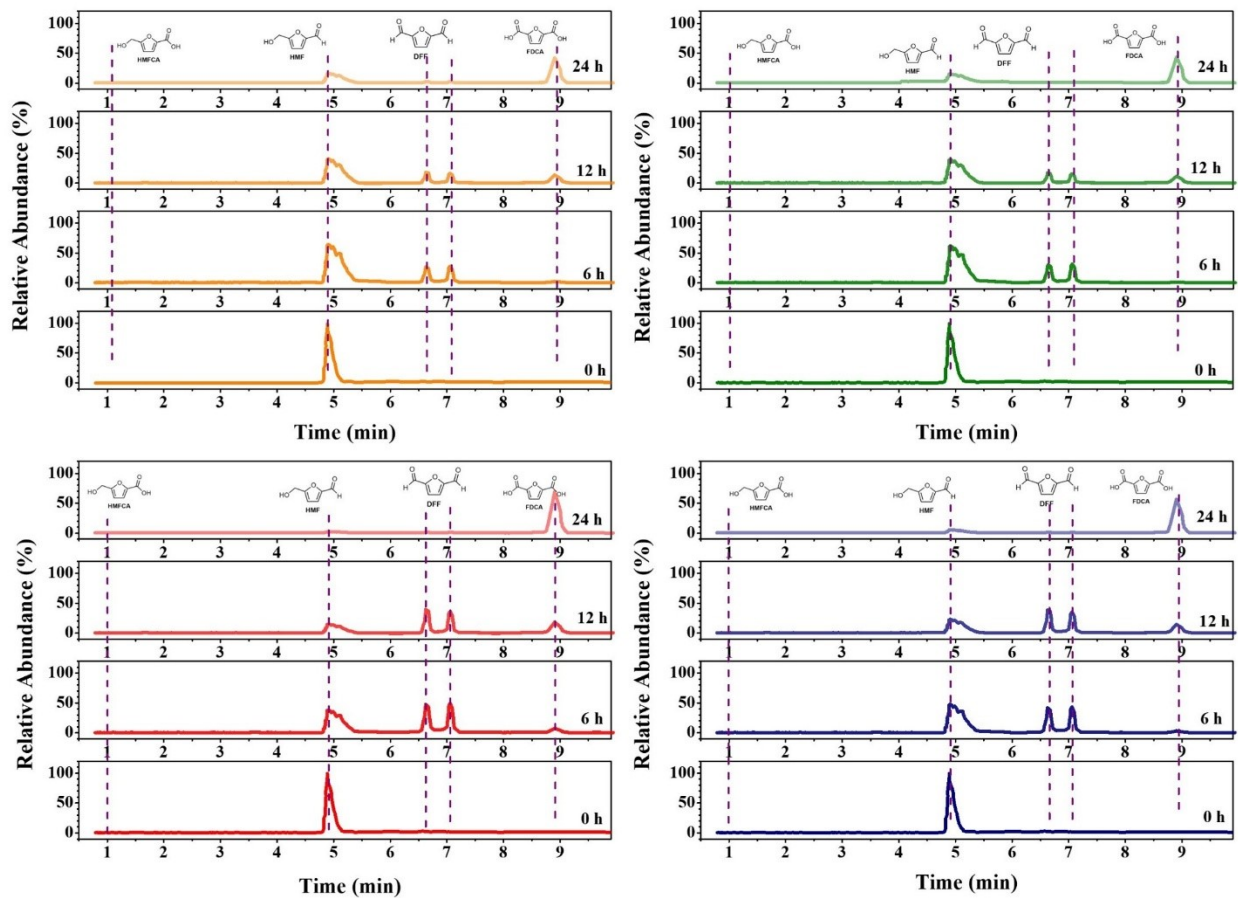

**Fig. S5** EPR spectra of CdS and Ir<sub>dp</sub>-CdS NPs using (a) DMPO and (b) TMP as  $\cdot\text{O}_2^-$ -trapping agent and  $^1\text{O}_2$ -trapping agents.

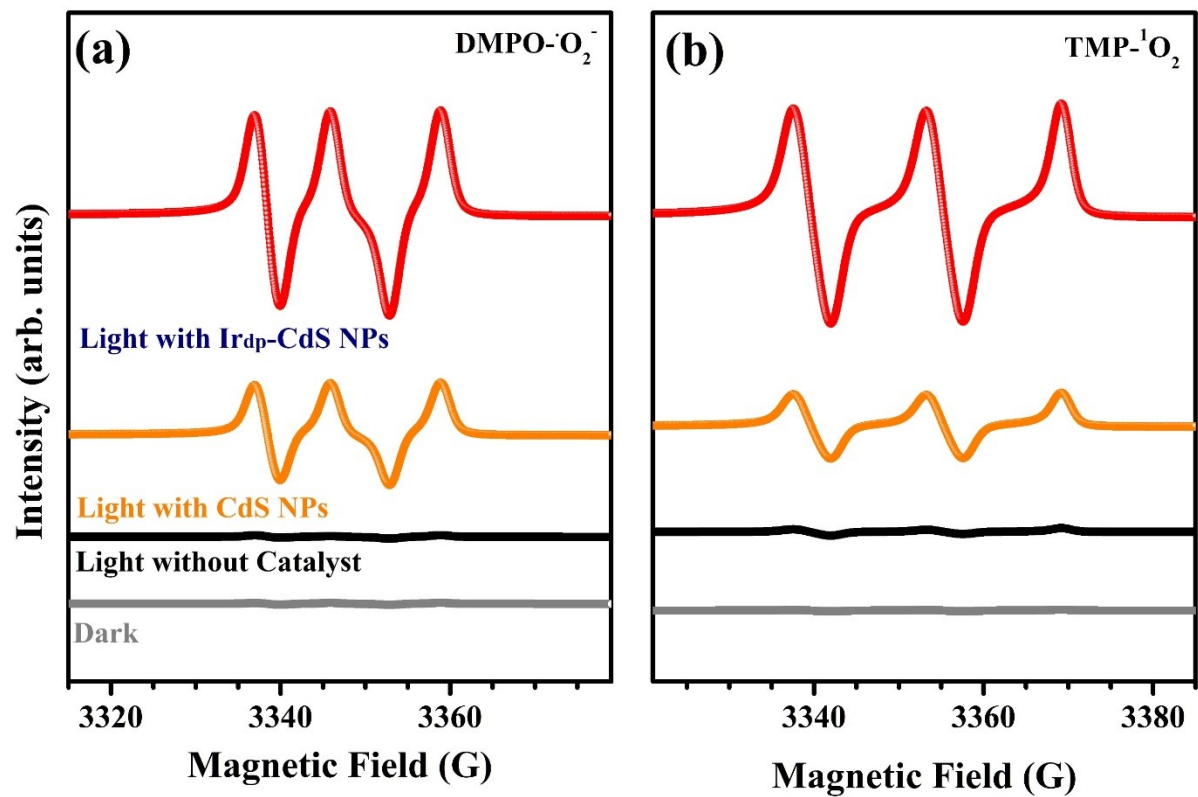

**Fig. S6** Conversion rate of HMF and FDCA yields in the presence of 1, 3, 5, and 7 wt.% doping of Li (a and d), Ir (b and e), and Pt (c and f) ions.

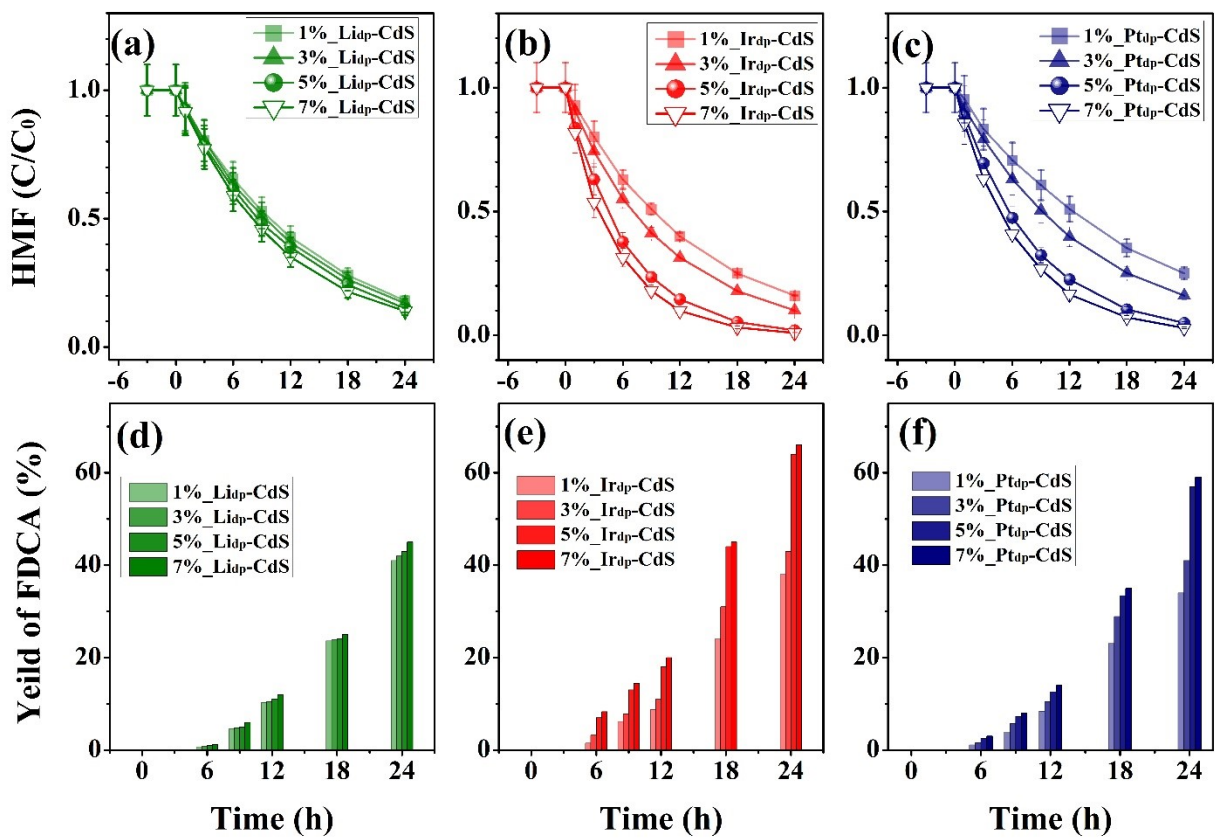

**Fig. S7** Cyclic photocatalytic HMF-decomposition data for CdS (orange),  $\text{Li}_{\text{dp}}\text{-CdS}$  (green),  $\text{Ir}_{\text{dp}}\text{-CdS}$  (red), and  $\text{Pt}_{\text{dp}}\text{-CdS}$  (blue) NPs at 445 nm.

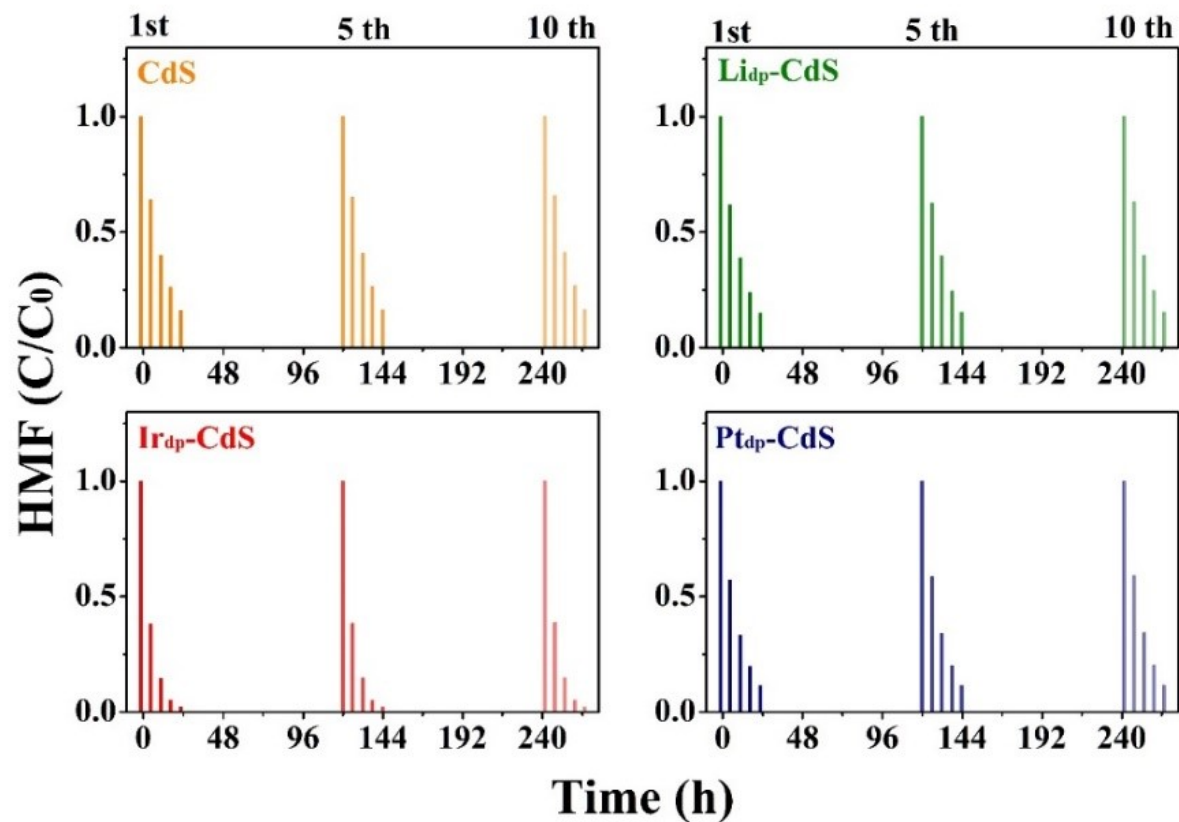

**Fig. S8** XRD patterns (a) before and (b) after PCR experiments for CdS (orange), Li<sub>dp</sub>-CdS (green), Ir<sub>dp</sub>-CdS (red), and Pt<sub>dp</sub>-CdS (blue) NPs.

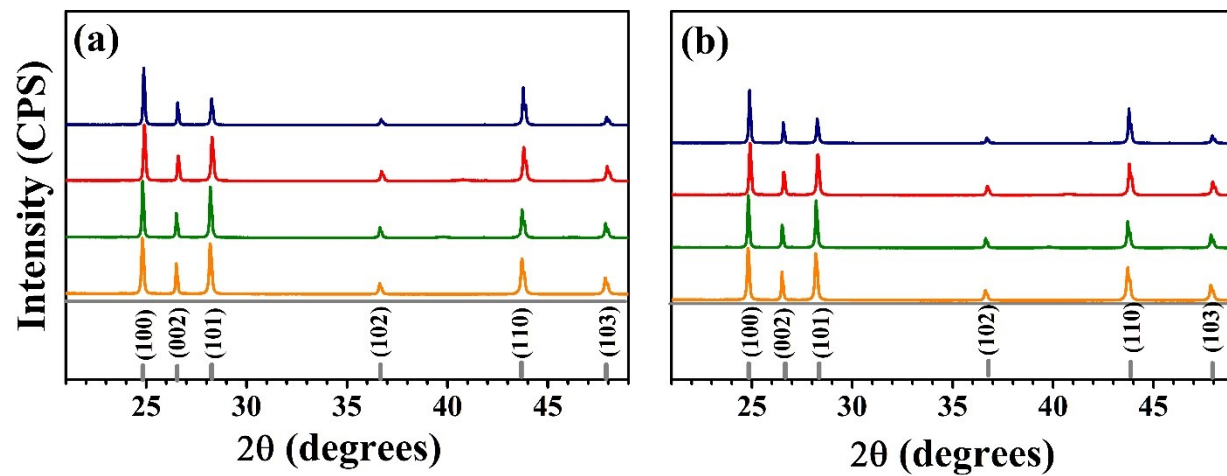

**Fig. S9** XPS spectra of (a–e) before and (f–j) after PCR experiments for CdS (orange), Li<sub>dp</sub>-CdS (green), Ir<sub>dp</sub>-CdS (red), and Pt<sub>dp</sub>-CdS (blue) NPs.

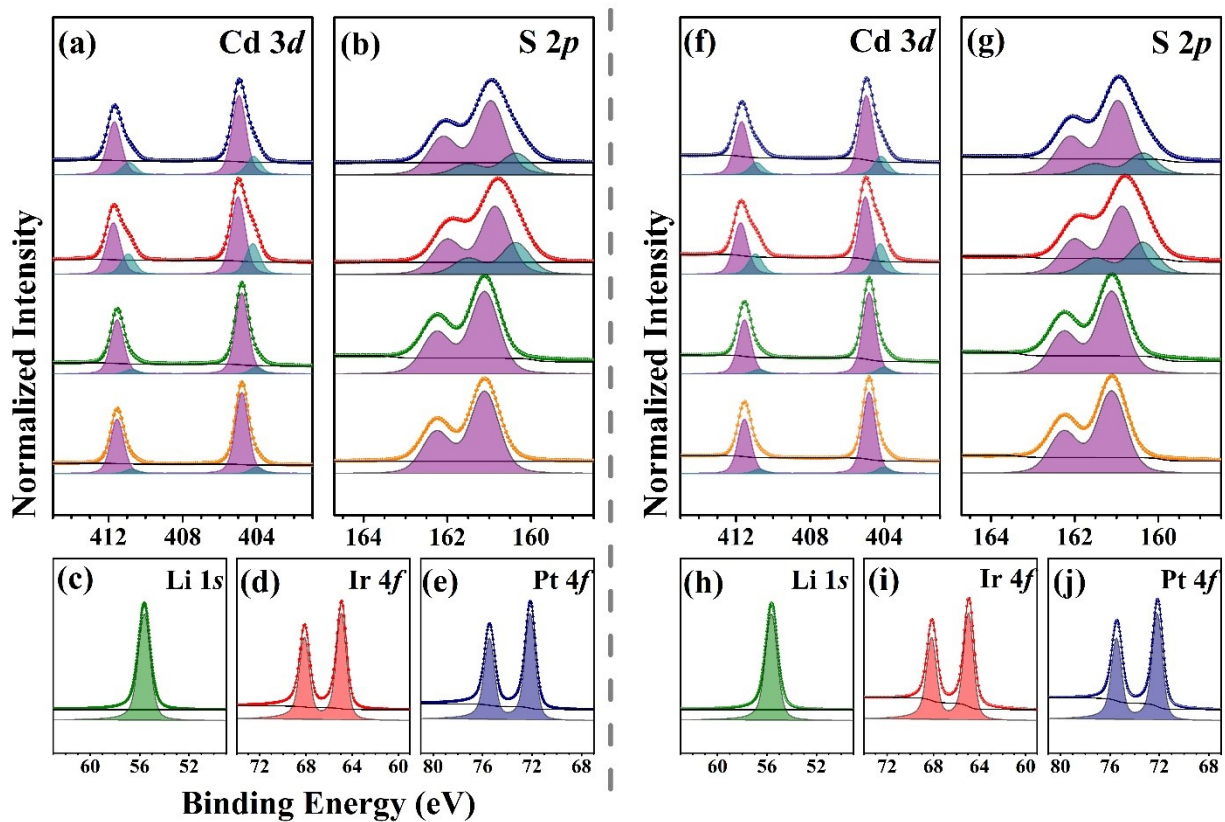

**Fig. S10** (a) LSV curve of  $\text{Pt}_{\text{dp}}\text{-CdS}$  NPs in 1 M KOH. Marked points indicate the overpotential at which bubble behavior was observed. (b) Corresponding optical images showing bubble dynamics at selected overpotentials of 0,  $-0.22$ ,  $-0.5$ , and  $-0.72$  V.

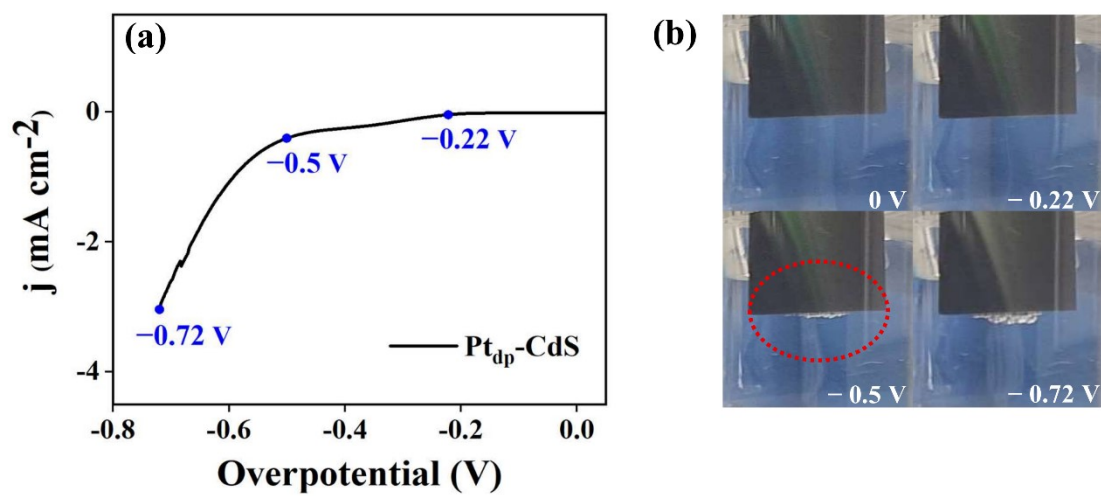

**Fig. S11** (a) LSV curve of Ir<sub>dp</sub>-CdS NPs in 1 M KOH. Marked points indicate the overpotential at which bubble behavior was observed. (b) Corresponding optical images showing bubble dynamics at selected overpotentials of 0, -0.22, -0.5, and -0.72 V.

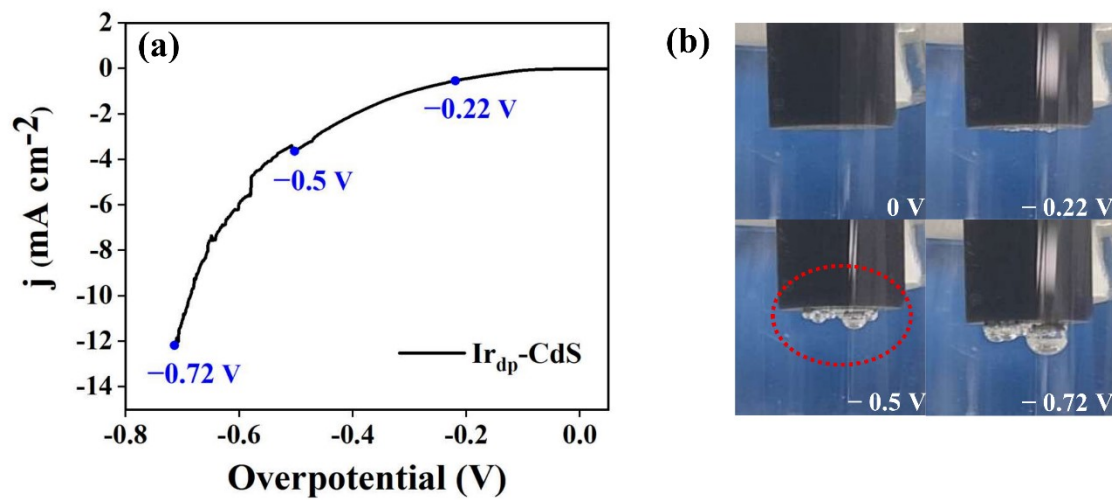

**Fig. S12** (a) LSV curve of Pt<sub>dp</sub>-CdS NPs in 1 M KOH. Marked points indicate the current density at which bubble behavior was observed. (b) Corresponding optical images showing bubble dynamics at selected current densities of 0, -0.04, -0.40, and -3.05 mA·cm<sup>-2</sup>.

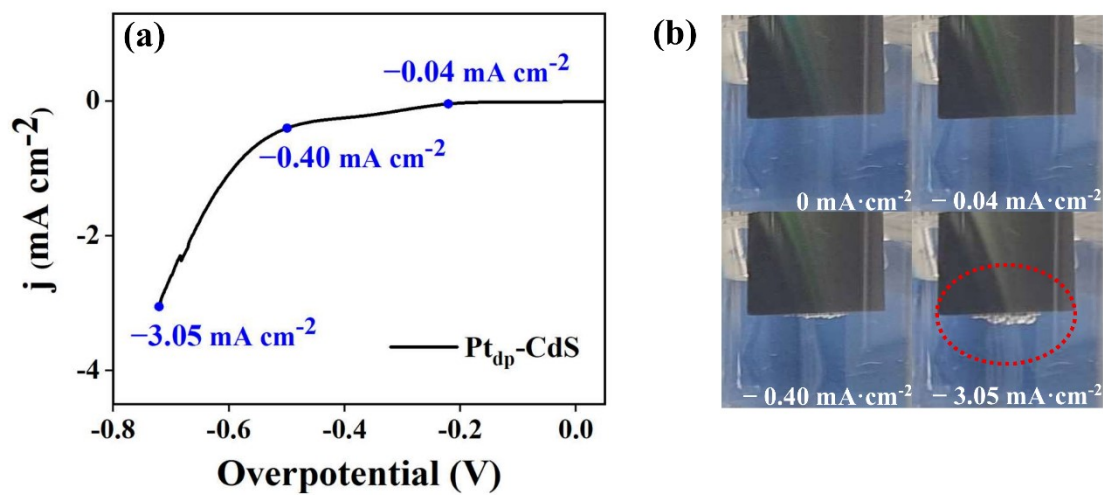

**Fig. S13** (a) LSV curve of Ir<sub>dp</sub>-CdS in 1 M KOH. Marked points indicate the current density at which bubble behavior was observed. (b) Corresponding optical images showing bubble dynamics at selected current densities of 0, -0.04, -0.40, and -3.05 mA·cm<sup>-2</sup>.

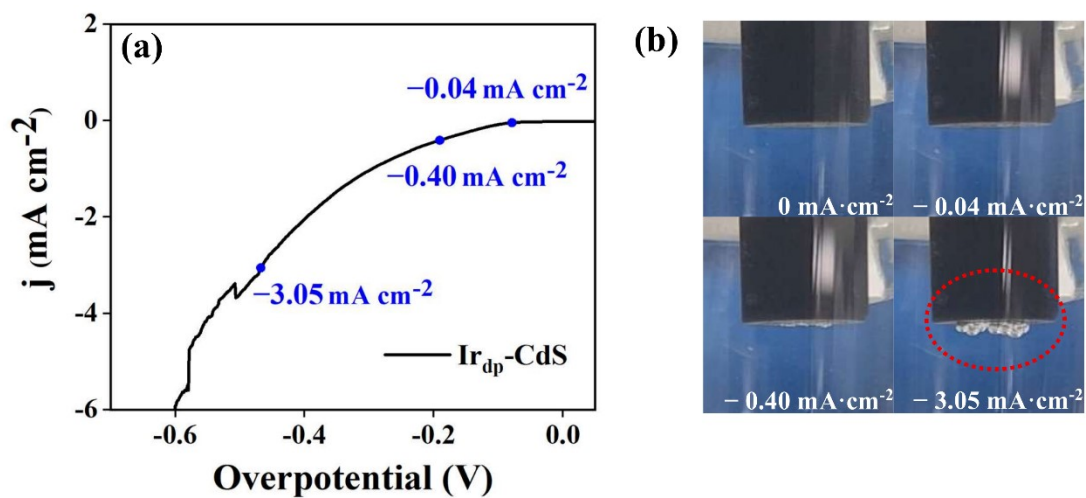

## References

- [1] P. Zhu, W. Zhang, Q. Li, H. Xia, *ACS Sustain. Chem. Eng.* 2022, **10**, 8778–8787.
- [2] X. Bao, M. Liu, Z. Wang, D. Dai, P. Wang, H. Cheng, Y. Liu, Z. Zheng, Y. Dai, B. Huang, *ACS Catal.* 2022, **12**, 1919–1929.
- [3] Y. Wang, C. Cai, *ACS Catal.* 2025, **15**, 3451–3463.
- [4] C. Zhang, P. Zhan, H. Shan, W. Ren, Y. Liu, X. Liu, S. Zheng, Z. Liao, D. Cai, P. Qin, *Chem. Eng. J.* 2025, **506**, 159946.
- [5] H. Yu, D. T. Hoang, H. S. Kim, H. Lee, *J. Mater. Chem. A*, 2025, **13**, 6049-6058.
- [6] M. J. S. Mohamed, M. A. Gondal, M. Hassan, M. A. Almessiere, A. A. Tahir and A. Roy, *ACS Omega*, 2023, **8**, 33332–33341.
- [7] P. V. Shinde, D. S. Gavali, R. Thapa, M. K. Singh and C. S. Rout, *AIP Advances*, 2021, **11**, 105010.
- [8] T. Munawar, A. Bashir, F. Iqbal, M. Rafaqat, C. Guo, M. Zhiani, C. Zhao, Y. Tong, S. A. Khan and M. Koc, *Fuel*, 2025, **385**, 134100.
- [9] M. Ali, E. Pervaiz and U. Sohail, *Energy & Fuels*, 2023, **37**, 7919–7926.
